1 **Utilization efficiency of human milk oligosaccharides by human-associated**

2 ***Akkermansia* is strain-dependent**

3 Estefani Luna<sup>1#</sup>, Shanthi G. Parkar<sup>1#</sup>, Nina Kirmiz<sup>1</sup>, Stephanie Hartel<sup>1</sup>, Erik Hearn<sup>1</sup>,  
4 Marziiah Hossine<sup>1</sup>, Arinnae Kurdian<sup>1</sup>, Claudia Mendoza<sup>1</sup>, Katherine Orr<sup>1</sup>, Loren  
5 Padilla<sup>1</sup>, Katherine Ramirez<sup>1</sup>, Priscilla Salcedo<sup>1</sup>, Erik Serrano<sup>1</sup>, Biswa Choudhury<sup>2</sup>,  
6 Mousumi Paulchakrabarti<sup>2</sup>, Craig T. Parker<sup>3</sup>, Steven Huynh<sup>3</sup>, Kerry Cooper<sup>4</sup>, and  
7 Gilberto E. Flores<sup>1\*</sup>

8 <sup>1</sup>*Department of Biology, California State University, Northridge, Northridge, CA 91330-8303.*

9 <sup>2</sup>*GlycoAnalytics Core, UC San Diego, Health Sciences, La Jolla, CA 92093-0687.*

10 <sup>3</sup>*Produce Safety and Microbiology Research Unit, Western Regional Research Center,*

11 *Agricultural Research Service, US Department of Agriculture, Albany, CA 94710.*

12 <sup>4</sup>*School of Animal and Comparative Biomedical Sciences, University of Arizona, Tucson, AZ*

13 *85721.*

14

15 \*Corresponding author: [gilberto.flores@csun.edu](mailto:gilberto.flores@csun.edu) (818) 677-4276

16 #Authors contributed equally to this work. Author order was determined both alphabetically and

17 in order of increasing seniority.

18

## 19 Utilization efficiency of human milk oligosaccharides by human-associated 20 *Akkermansia* is strain-dependent

### 21 Abstract

22 *Akkermansia muciniphila* are mucin degrading bacteria found in the human gut and are  
23 often associated with positive human health. However, despite being detected as early as  
24 one month of age, little is known about the role of *Akkermansia* in the infant gut. Human  
25 milk oligosaccharides (HMOs) are abundant components of human milk and are  
26 structurally similar to the oligosaccharides that comprise mucin, the preferred growth  
27 substrate of human-associated *Akkermansia*. A limited subset of intestinal bacteria has been  
28 shown to grow well on HMOs and mucin. We therefore examined the ability of  
29 genomically diverse strains of *Akkermansia* to grow on HMOs. First, we screened 85  
30 genomes representing the four known *Akkermansia* phylogroups to examine their  
31 metabolic potential to degrade HMOs. Furthermore, we examined the ability of  
32 representative isolates to grow on individual HMOs in a mucin background and analyzed  
33 the resulting metabolites. All *Akkermansia* genomes were equipped with an array of  
34 glycoside hydrolases associated with HMO-deconstruction. Representative strains were all  
35 able to grow on HMOs with varying efficiency and growth yield. Strain CSUN-19  
36 belonging to the AmIV phylogroup, grew to the highest level in the presence of fucosylated  
37 and sialylated HMOs. This activity may be partially related to the increased copy numbers  
38 and/or the enzyme activities of the  $\alpha$ -fucosidases,  $\alpha$ -sialidases, and  $\beta$ -galactosidases.  
39 Utilization of HMOs by strains of *Akkermansia* suggests that ingestion of HMOs by an  
40 infant may enrich for these potentially beneficial bacteria. Further studies are required to  
41 realize this opportunity and deliver long-lasting metabolic benefits to the human host.

42 Keywords: *Akkermansia muciniphila*, human milk oligosaccharides, fucosylated HMO,  
43 sialylated HMO, HMO utilization, *Akkermansia* phylogroups

### 44 Importance

45 Human milk oligosaccharides (HMOs) are utilized by a limited subset of bacteria in the  
46 infant gut. *Akkermansia* are detected in infants as young as one month of age and are  
47 thought to contribute to the HMO deconstruction capacity of the infant. Here, using

48 phylogenomics, we examined the genomic capacity of different *Akkermansia* phylogroups  
49 to potentially deconstruct HMOs. Furthermore, we experimentally showed that strains from  
50 all the currently known phylogroups of *Akkermansia* can deconstruct all the major types of  
51 HMOs, albeit with different utilization efficiencies. This study thus examines *Akkermansia*-  
52 HMO interactions that can potentially influence the gut microbial ecology during the first  
53 1,000 days of life - a critical phase for the development of the gut microbiome and infant  
54 health.

55 This study will be of interest to a wide range of scientists from microbiologists,  
56 glycochemists/glycobiologists, to functional food developers investigating *Akkermansia* as  
57 probiotics or functional foods containing milk oligosaccharides as prebiotics.

## 58 **Introduction**

59 *Akkermansia muciniphila* is a mucin-degrading specialist that colonizes the mucus layer of the  
60 human gastrointestinal tract.<sup>1</sup> Paradoxically, *Akkermansia* also promote mucus production by  
61 enhancing the differentiation of gut epithelial cells, thereby influencing mucosal homeostasis.<sup>2</sup>  
62 Numerous positive associations have been observed between this bacterial lineage and human  
63 health. In adults, a decreased abundance of *Akkermansia* is associated with metabolic  
64 impairments,<sup>3</sup> ulcerative colitis,<sup>4</sup> and inflammatory bowel disease.<sup>5</sup> In infants, a decrease in  
65 mucosal residents such as *Akkermansia* is associated with a compromised immune system and  
66 the development of atopic dermatitis.<sup>6</sup>

67 The mechanisms by which *A. muciniphila* benefit human health appears to be directly  
68 linked to its ecological niche along the human gastrointestinal tract. Specifically, *A. muciniphila*  
69 colonizes the oxic-anoxic interface of the mucus layers adjacent to host epithelial cells where  
70 they degrade host-produced mucins.<sup>7</sup> Mucins are the main structural components of mucus and  
71 are composed of polypeptide chains rich in serine, threonine, and proline residues that are *O*-  
72 linked to a variety oligosaccharides.<sup>8</sup> These oligosaccharide side chains are comprised of N-  
73 acetylgalactosamine (GalNAc), N-acetylglucosamine (GlcNAc), galactose, and are capped with

74 N-acetylneuraminic acid (Neu5Ac; sialic acid), fucose, or sulfate. *Akkermansia* can utilize  
75 mucins as their sole carbon and nitrogen source, generating metabolites such as acetate and  
76 succinate, and propionate in the presence of vitamin B12.<sup>9,10</sup> Co-occurring members of the gut  
77 microbiome convert some of the acetate produced to butyrate.<sup>11</sup> Together, these organic acids  
78 fuel colonocytes and act as signaling molecules helping to maintain an overall anti-inflammatory  
79 tone in the gut.<sup>12</sup> In addition to producing anti-inflammatory metabolites, *A. muciniphila* produces  
80 an extracellular surface protein, coded by Amuc\_1100, that interacts directly with Toll-Like  
81 Receptors on host epithelial cells.<sup>13,14</sup> This interaction results in the production of specific anti-  
82 inflammatory cytokines including IL-10 that leads to an improvement in overall gut barrier  
83 function.<sup>13</sup>

84 Building upon previous work by Guo and colleagues,<sup>15</sup> we recently performed a  
85 comparative genomic analysis of 75 *Akkermansia* genomes to define the genomic and functional  
86 landscape of this lineage. This analysis identified at least four distinct phylogroups AmI-AmIV,  
87 with the type strain *A. muciniphila* Muc<sup>T</sup>, belonging to the AmI phylogroup. Additionally, this  
88 work showed that the *Akkermansia* phylogroups had differing functional potentials including *de*  
89 *novo* biosynthesis of vitamin B12 by members of the AmII and AmIII phylogroups.<sup>10</sup>

90 Continuing to explore the genomic and metabolic diversity of human-associated  
91 *Akkermansia*, we next wanted to determine if host-produced glycans, other than those in mucin,  
92 could support growth of the various *Akkermansia* phylogroups. Because of the compositional  
93 and structural similarities between the oligosaccharides found in mucin and human milk, we  
94 focused on human milk oligosaccharides (HMOs).<sup>8,16,17</sup> Human milk contains 5-15 g/L HMOs,  
95 of which 50-80% are fucosylated, and 10-20% are sialylated.<sup>16</sup> Although HMOs are present in  
96 milk as a pool of over 200 diverse structures, they are composed of only five monosaccharides:

97 glucose, galactose, fucose, N-acetylglucosamine (GlcNAc), and sialic acid.<sup>16</sup> These  
98 oligosaccharides contain a lactose core at the reducing end that is extended with building block  
99 monosaccharides via glycosidic linkages. In human milk, fucose can be attached via  $\alpha$ 1-2,  $\alpha$ 1-3,  
100 and  $\alpha$ 1-4 linkages, and sialic acid can be attached via  $\alpha$ 2-3 and  $\alpha$ 2-6 linkages. Simple, abundant,  
101 and routinely studied HMO structures include lacto-N-tetraose (LNT), lacto-N-neotetraose  
102 (LNnT), 2'-fucosyllactose (2'-FL), 3-fucosyllactose (3-FL), 6'-sialyllactose (6'-SL), and 3'-  
103 sialyllactose (3'-SL).<sup>18</sup>

104         The oligosaccharides found in human milk are not digestible by the developing infant and  
105 reach the intestine intact.<sup>19</sup> Once there, HMOs have a variety of functions including providing  
106 protection from pathogens, playing a role in modulation of gut epithelial cells, and enriching for  
107 a beneficial microbiota.<sup>20-22</sup> Several studies have screened HMO consumption by various  
108 intestinal commensals and have identified a limited group of bacteria, primarily *Bifidobacterium*  
109 and select *Bacteroides*, with this ability.<sup>23-25</sup> One *Akkermansia* strain, belonging to phylogroup  
110 AmI, (i.e., *A. muciniphila* Muc<sup>T</sup>) has recently been shown to grow on human milk and select  
111 HMOs using a repertoire of glycoside hydrolase (GH) enzymes.<sup>26</sup> In this current study, we  
112 expand our understanding of this HMO-degrading capacity of human-associated *Akkermansia*  
113 beyond the one phylogroup. We hypothesized that *Akkermansia* from the different phylogroups  
114 will differ in their ability to metabolize HMOs, and these differences are related to their genomic  
115 composition. To investigate the ability of *Akkermansia* to grow on select HMO, we first took a  
116 comparative genomics approach focusing on the presence and abundance of genes coding for  
117 glycoside hydrolase enzymes known to be involved in HMO catabolism. We then performed  
118 comparative growth experiments and demonstrated robust growth of representative strains from  
119 each phylogroup in a basal medium supplemented with five individual pure HMOs, in a

120 background of mucin – thus simulating the carbon sources available in the infant gut  
121 environment. These findings expand the known metabolic capabilities of human-associated  
122 *Akkermansia* and point to further functional differences among the genomically distinct  
123 phylogroups.

## 124 **Results**

### 125 *Isolation, identification, and genomics*

126 In total, 17 human-associated *Akkermansia* were isolated from healthy adults, 10 from males,  
127 and 7 from females (Supplemental Table S2). Phylogenetic analyses of nearly complete 16S  
128 rRNA gene sequences from each isolate revealed three well-supported clades with the AmIII  
129 phylogroup nested within the AmII phylogroup (Figure 1A). At least one isolate was obtained  
130 from the four known human-associated phylogroups.<sup>10</sup> Ten of the 17 isolates treed within the  
131 AmI phylogroup, followed by four AmII, two AmIV, and one AmIII.

132 *[Figure 1 near here]*

133 Using the 16S rRNA tree as a guide, we selected 11 of the isolates spanning each  
134 phylogroup for genomic sequencing. Characteristics of these draft genomes are presented in  
135 Table 1. Of the new isolates, draft genome size ranged from 2.86 Mb (CSUN-56, AmIII) to 3.15  
136 Mb (CSUN-19, AmIV) with 2,658 to 3,111 coding sequences (CDs), respectively, as compared  
137 with 2.67 Mb genome size and 2,576 CDs in *A. muciniphila* Muc<sup>T</sup>. Across phylogroups,  
138 approximately 52% of CDs could be assigned a function, on average. Resolution of the AmIII  
139 phylogroup was improved with phylogenomic analysis that included 49 protein-coding genes  
140 (Figure 1B).

141 *[Table 1 near here]*

142 To investigate the carbohydrate degrading potential of the *Akkermansia* strains, 85  
143 genomes, including the 11 isolates from this study, were annotated against the CAZy database,<sup>27</sup>  
144 using dbCAN.<sup>28,29</sup> We first took a global look at all annotated GH families and found  
145 significantly less GH annotations in genomes from the AmI phylogroup compared to other  
146 phylogroups (Kruskal-Wallis,  $\chi^2 = 55.128$ ,  $P < 0.0001$ , Supplemental Figure S2). Further, we  
147 identified consistent similarities and differences in the complement of GH annotations within and  
148 between each phylogroup (Figure 2). With a few minor exceptions, these similarities and  
149 differences in GH counts resulted in the clustering of genomes into their respective phylogroups  
150 as evidenced by the dendrogram along the y-axis in Figure 2.

151 ***[Figure 2 near here]***

152 Next, since we were interested in the ability of *Akkermansia* to degrade HMO, we  
153 focused on HMO-associated GH families previously identified in other organisms.<sup>26,30-33</sup> With  
154 this approach, we identified differences in the copy number of several GH families that are  
155 associated with degradation of HMO-glycans;  $\alpha$ -fucosidases,  $\alpha$ -sialidases,  $\beta$ -galactosidases, N-  
156 acetyl  $\beta$ -hexosaminidases (Table 2). Most of these genes were also found to possess a signal  
157 peptide (Supplementary Excel Data 1), which is indicative of encoding for extracellular  
158 enzymes.<sup>34,35</sup> Of note was the high number of GH20 genes as compared with any other GH gene  
159 in all the genomes. The number of putative  $\alpha$ -fucosidases (GH29, GH95 and GH141) and N-  
160 acetyl  $\beta$ -hexosaminidases (GH18, GH20, GH84 and GH109) also varied across phylogroups  
161 (lowest for AmI including the strain tested here, *A. muciniphila* Muc<sup>T</sup>). Of the four strains  
162 investigated for HMO catabolic capacity in this study, the CSUN-19 (AmIV phylogroup) and  
163 CSUN-56 (AmIII) strains showed 9 fucosidase annotations as compared with 8 for CSUN-17  
164 (AmII) and 7 for *A. muciniphila* Muc<sup>T</sup> (AmI; Table 2).

165 *[Table 2 near here]*

166 *Utilization of HMOs*

167 Representatives of each phylogroup were tested for their ability to grow on HMO in the presence  
168 of mucin. After 48 h of incubation, all strains tested grew to higher ODs in the HMO (or  
169 lactose)-supplemented mucin medium compared to growth in medium lacking HMOs (Figure 3).  
170 Growth yield varied across strains on media with 2'-FL, 3-FL, LNnT, and 6'-SL, but not LNT or  
171 lactose ( $P < 0.05$ , ANOVA). Post-hoc comparisons revealed that strain CSUN-19, representing  
172 the AmIV phylogroup, showed the greatest growth in comparison to the other strains, with  
173 significant increases compared with *A. muciniphila* Muc<sup>T</sup> in 2'-FL, 3-FL, and 6'-SL; and with  
174 CSUN-56 in 2'-FL, 3-FL, and LNnT (Figure 3).

175 *[Figure 3 near here]*

176 To confirm HMO utilization, we measured the concentrations of HMOs (2'-FL, LNT and  
177 6'-SL) and their sugar constituents (except GlcNAc for LNT) before and after 48 h of incubation  
178 (Figure 4a and 4b). In addition to the difference in growth yield, the difference in the % HMO  
179 utilized also varied across strains ( $P < 0.05$ ). For 2'-FL, strains representing the AmI, AmII, and  
180 AmIII phylogroups utilized greater than 93% of the available HMO, while CSUN-19 (AmIV)  
181 utilized just over 64% despite having the highest growth yield as measured by the change in  
182 OD<sub>600nm</sub>. Nearly all of the fucose liberated from 2'-FL was removed from the medium within 48  
183 h by all the strains, while the lactose backbone accumulated in the culture medium of all strains  
184 except CSUN-19 (AmIV) (Figure 4c). Degradation of LNT ranged from 25.4 -78.6% across  
185 tested strains with CSUN-17 (AmII) utilizing the least and *A. muciniphila* Muc<sup>T</sup> (AmI) utilizing  
186 the most. In contrast to growth on 2'-FL, most of the lactose from LNT was consumed across  
187 strains (Figure 4d). Similar to LNT, there was a wide range of 6'-SL utilization across strains ( $P$



188 < 0.001), ranging from 29.3% (CSUN-17, AmII) to 89.2% (CSUN-19, AmIV). In the case of 6'-  
189 SL, CSUN-19 showed the greatest growth, while *A. muciniphila* Muc<sup>T</sup> showed the least growth,  
190 and yet the % substrate utilized (80%) showed no significant difference and was significantly  
191 higher than the ~50% and ~30% utilization seen with CSUN-56 and CSUN-17, respectively. In  
192 all strains, sialic acid accumulated in the culture media and was not consumed when liberated  
193 from 6'-SL (Figure 4e).

194 *[Figure 4 near here]*

## 195 Discussion

196 *Akkermansia* are largely considered beneficial members of the human gut microbiome and are  
197 currently of significant interest for their therapeutic potential.<sup>36</sup> Until recently, however, all  
198 research involving these promising bacteria focused on a single species, *A. muciniphila* Muc<sup>T</sup>  
199 belonging to the AmI phylogroup. Here, we continue to build upon recent work by ourselves and  
200 others describing genomic and functional diversity within this lineage.<sup>10,37</sup> Specifically, we show  
201 genomically diverse strains possess different complements of GH genes that encode enzymes  
202 catalyzing the deconstruction of HMOs into constituent mono- and disaccharides. Furthermore,  
203 we demonstrate that four different *Akkermansia* strains representing the four known phylogroups  
204 can deconstruct HMOs, with this biological activity varying across strains. These differences in  
205 genomic and functional traits of the human-associated *Akkermansia*, along with diversity in the  
206 substrates that are presented to the gut bacteria in the form of breast milk or supplemented infant  
207 milk formula, potentially impact how and when *Akkermansia* colonize the human gastrointestinal  
208 tract. For example, the ability to utilize HMOs efficiently could provide a competitive advantage  
209 for the early colonization of the infant gut with human-associated *Akkermansia* in a strain-  
210 dependent manner. *Akkermansia* are key contributors to the infants' glycan-metabolizing

211 capacity as early as 4 months of age,<sup>33</sup> and may therefore play a critical role in establishing a  
212 foundation of metabolic fitness in the naïve microbiome. Taken together, these findings expand  
213 the known metabolic niche and interaction network of *Akkermansia* in the human gut early in  
214 life.

215 Bacterial growth studies have demonstrated that relatively few gut bacteria grow well on  
216 HMOs, the exceptions being bifidobacteria and select *Bacteroides*, both dominant members of  
217 the infant gut.<sup>24,25</sup> Both bifidobacteria and *Bacteroides* employ an array of glycoside hydrolases  
218 including fucosidases (GH29 and GH95), sialidases (GH33), galactosidases (GH2 and GH16),  
219 lacto-N-biosidases (GH20), and hexosaminidases (GH20) to deconstruct HMO linkages.<sup>38-44</sup> Our  
220 phylogenomic characterization of the *Akkermansia* genomes shows that the various strains from  
221 the four *Akkermansia* phylogroups possess a wealth of these same gene annotations, albeit in  
222 differing abundances, that could be used for the deconstruction of either HMO or mucin.  
223 Bifidobacteria employ two major strategies to hydrolyze HMOs.<sup>31,42</sup> Infant-associated  
224 *Bifidobacterium infantis*, *Bifidobacterium breve*, and *Bifidobacterium longum* primarily consume  
225 HMOs by employing intracellular glycoside hydrolases to deconstruct the HMO  
226 structures.<sup>41,42,45-47</sup> Using an alternative strategy, *Bifidobacterium bifidum* extracellularly process  
227 the HMO via an array of membrane associated glycoside hydrolases.<sup>31,48</sup> *Bacteroides* spp.  
228 harbor polysaccharide utilization loci (PULs) that encode a diverse array of glycosidases capable  
229 of breaking down host-produced and plant-derived polysaccharides.<sup>44,49</sup> *Bacteroides* are  
230 hypothesized to bind HMOs on the cell surface followed by hydrolysis of the HMOs and import  
231 of the resultant oligo-saccharides for further breakdown. They co-opt their mucin-utilization  
232 PULs to deconstruct and utilize HMOs with varying efficiency depending on the strain. *B.*  
233 *fragilis* are the most efficient preferring HMOs with a high degree of polymerization and non-

234 fucosylated HMOs over fucosylated HMOs,<sup>24</sup> and even utilize the sialic acid generated after  
235 deconstruction of sialylated HMOs.<sup>44</sup> *Akkermansia* do not have the typical PUL genomic  
236 organization seen in the *Bacteroides*, but they do appear to harness extracellular GHs either in  
237 the periplasmic space or outside of the cell altogether to cleave monosaccharides or  
238 disaccharides from mucin or HMOs.<sup>9,26</sup> In agreement, the majority of our GH annotations  
239 included signal peptide sequences indicative of export outside of the cytoplasmic membrane.  
240 Extracellular cleavage of HMO (and mucin) results in the liberation of monosaccharides and  
241 disaccharides that enables cross-feeding by other members of the gut microbiome.<sup>11</sup> In the  
242 context of the infant gut, this cross-feeding could help facilitate colonization of new members to  
243 the gut community that are encountered as infants grow and consume new foods, aiding in the  
244 maturation of the gut microbiome in the early years of life.

245 In addition to the cross-feeding on sugars liberated from host substrates, members of the  
246 gut microbiome feed off fermentation waste products produced by *Akkermansia*. In the case of  
247 fucosylated substrates such as 2'-FL, a distinct metabolite of fucose fermentation is 1,2-  
248 propanediol.<sup>26</sup> Several bacterial genera including both beneficial (*Lactobacillus* spp.,  
249 *Eubacterium hallii*) and pathogenic (*Salmonella*) bacteria, can grow on 1,2-propanediol in a  
250 vitamin B12-dependent manner.<sup>50,51</sup> Given our recent work showing that the AmII and AmIII  
251 phylogroups synthesize vitamin B12<sup>10</sup>, these findings indicate the possibility of *Akkermansia*-  
252 driven syntrophic interactions that are likely phylogroup-specific. This is particularly relevant as  
253 the gut microbiome of exclusively breast-fed infants has a decreased capacity for *de novo*  
254 synthesis of vitamin B12, compared with formula-fed infants.<sup>52</sup> Therefore, if *Akkermansia* are to  
255 be used therapeutically, then it will be important to consider the strain to be used in the context  
256 of the host's age and health status. Alternatively, if *Akkermansia* are already present in the host,

257 it will be important to know which strain is present to better predict the outcome of any  
258 microbiome or dietary intervention.

259 Several studies have detected *Akkermansia* in stool of infants as early as one-month after  
260 birth, in most one-year olds,<sup>53</sup> and even in human colostrum and milk,<sup>54,55</sup> demonstrating that it  
261 colonizes the gut early in life and providing a possible route of inoculation. Two separate studies  
262 found direct associations between the abundance of *Akkermansia* and fucosylated HMO in  
263 human milk, suggesting that fucosylated HMO may help enrich for *Akkermansia* in the gut of the  
264 infant.<sup>56,57</sup> Here we show that fucosylated HMOs support robust growth across all strains of  
265 *Akkermansia*. Growth did, however, vary by strain suggesting potential differences in growth  
266 and metabolic efficiencies across strains. When grown on 2'-FL, the liberated fucose was rapidly  
267 depleted from the culture medium, while the lactose component accumulated in the culture  
268 medium (except for CSUN-19) suggesting a general preference for fucose over lactose in  
269 *Akkermansia*. Cleavage of fucose from HMOs (and mucin) is mediated by fucosidases belonging  
270 to the GH29 or GH95 families,<sup>31,38,49</sup> which were both found in all the four *Akkermansia* strains.  
271 GH141, a putative fucosidase or xylanase, was also observed in some of our AmI and AmIII  
272 genomes in this study. Kostopoulos et al. recently demonstrated that a GH29 gene product  
273 (encoded by Amuc\_0010) in *A. muciniphila* Muc<sup>T</sup> had relatively poor catalytic activity against  
274 2'-FL, suggesting that 2'-FL was not the preferred substrate for this enzyme<sup>26</sup>. Overall, *A.*  
275 *muciniphila* Muc<sup>T</sup> has four GH29 gene annotations, two of GH95, and one of GH141, and all of  
276 these GH families could potentially encode enzymes that are involved in degradation of  
277 fucosylated HMOs containing the  $\alpha$ 1-2 linkage. The number of these same GH families also  
278 varied across phylogroups potentially leading the differences in growth efficiencies we observed.  
279 Given the prominent role of fucosylated HMOs in modulating the microbiome and enhancing

280 health, and that the concentration of 2'-FL along with lacto-N-fucopentaose were highest during  
281 early lactation,<sup>58</sup> the diversity of fucosidases available in each strain make *Akkermansia* a  
282 potential candidate to further investigate in the field of infant-associated probiotics.

283 Sialyl oligosaccharides are associated with many benefits to neonates and infants.<sup>59,60</sup>  
284 For example, Charbonneau and colleagues demonstrated that the concentration of sialylated  
285 HMOs in breastmilk correlated with growth in healthy Malawian infants<sup>60</sup>. Furthermore,  
286 gnotobiotic mammals receiving fecal microbiota from infants with stunted growth and  
287 supplementation with sialylated bovine milk oligosaccharides, improved growth (measured as  
288 weight gain and bone mass), with their gut microbiota developing metabolic fitness evidenced by  
289 an increase in genes related to energy metabolism<sup>60</sup>. Sialic acid is an essential component of  
290 brain gangliosides, and plays an important role in neuronal development, memory formation, and  
291 cognition.<sup>59</sup> Three weeks of dietary supplementation with 3'-SL or 6'-SL administered to day-  
292 old piglets, increased the ganglioside-bound sialic acid in the brain of the piglets, thus providing  
293 essential nutrients for brain growth and neurodevelopment<sup>61</sup>. With regards to *Akkermansia* and  
294 sialylated HMOs, all four *Akkermansia* strains showed enhanced growth on 6'-SL and were able  
295 to deconstruct this sialylated oligosaccharide, but the growth yield and the percent of the  
296 substrate degraded varied significantly across strains. These differences in yield and degradation  
297 did not align with the sialidase (GH33) gene copy number. For example, strain CSUN-56  
298 representing AmIII has 5 sialidase annotations, and exhibited relatively poor growth with little  
299 degradation of 6'-SL. This incongruence between the bacterial gene number of a GH  
300 metabolizing a substrate and the physiological response to that substrate indicates the need to  
301 examine the transcription of the GHs and the enzyme kinetics of associated GHs involved in the  
302 complete deconstruction of a substrate and their transport into the cell. However, the

303 accumulation of sialic acid in spent medium after growth on 6'-SL in all strains agrees with  
304 previous reports of *Akkermansia* lacking the NAN operon for import and consumption of sialic  
305 acid.<sup>26</sup> The sialic acid released from the non-reducing end of the sugars enables access to the  
306 remaining oligosaccharides, while also potentially encouraging the outgrowth of sialic acid  
307 metabolizing, abundantly-present commensal species such as *B. fragilis*, *Faecalibacterium*  
308 *prausnitzii*, *Ruminococcus gnavus*, and members of the *Lactobacillus* and *Bifidobacterium*  
309 genus.<sup>17,62,63</sup> Several species of *Enterobacteriaceae* such as *Escherichia coli* and *Salmonella*  
310 *enterica* also thrive in a sialic acid-rich gut environment, with their fitness and virulence directly  
311 proportional to their ability to metabolize sialic acid.<sup>62</sup> Interestingly though, studies in piglets  
312 demonstrated that supplementation with 6'-SL enhanced colonic bacteria such as *Collinsella*  
313 *aerofaciens* *Ruminococcus*, *Faecalibacterium*, and *Prevotella* spp., while suppressing  
314 *Enterobacteriaceae*, *Enterococcaceae*, *Lachnospiraceae*, and Lactobacillales.<sup>61</sup> Given the  
315 vulnerability of the infant population and the immaturity of the gut microbiome in early life,  
316 identifying the metabolic fate of the sialic acid and the interaction between *Akkermansia* and  
317 sialic acid-metabolizing commensals and potential pathogens warrants further investigation.

318 *Akkermansia* are adapted to robust growth on mucin due to their habitation in the gut  
319 epithelial mucosa.<sup>64</sup> Furthermore HMOs, that are resistant to host digestive enzymes, are  
320 presented to the colonic microbiota in a mucin-rich background of the infant gut.<sup>65</sup> We therefore  
321 included mucin in our HMO utilization experiments. However, it is recognized that *Akkermansia*  
322 can grow in a mucin-deficient medium supplemented with GlcNAc, threonine, and tryptone.<sup>9</sup>  
323 GlcNAc is a requirement for growth as *Akkermansia* do not express the enzyme required for  
324 conversion of fructose-6-phosphate to glucosamine-6-phosphate, an essential component of the  
325 cell wall peptidoglycan.<sup>64</sup> GlcNAc was thus added into the basal growth medium by Kostopoulos

326 and colleagues. whilst investigating HMO utilization by *Akkermansia muciniphila* Muc<sup>T</sup>.<sup>26</sup> We  
327 speculate that *Akkermansia* may potentially grow in the presence of GlcNAc-containing HMOs  
328 such as LNT or LNnT, provided that the amino acid sources are added to the growth medium.  
329 However, since our current technique precluded analysis of GlcNAc, further growth experiments  
330 and chemical analyses are required to confirm this prediction.

331 In conclusion, human-associated *Akkermansia* can utilize a variety of host-derived HMOs  
332 for growth *in vitro* in a strain-dependent manner. This implies that the prebiotic effects of HMOs  
333 will depend on the resident strain of *Akkermansia* present in an individual. When grown on  
334 HMO, *Akkermansia* liberate sugars and produce fermentation products that can fuel other  
335 members of the gut microbiome. Considering the presence of *Akkermansia* in the neonatal gut  
336 and the high abundance of oligosaccharides in mothers' milk, *Akkermansia* may be considered as  
337 keystone species and nature's way of engineering early life gut microbiome to grant long-lasting  
338 effects on metabolic fitness.

## 339 **Methods**

### 340 ***Recruitment and Sampling***

341 Fecal samples used for *Akkermansia* isolations were obtained from 17 consenting healthy adults  
342 as previously described by Kirmiz et al.<sup>10</sup> under protocol #1516-146, with approval from the  
343 Institutional Review Board at California State University, Northridge. Samples were refrigerated  
344 (4°C) and inoculated into culture medium (see below) within 24 h of collection.

### 345 ***Bacterial isolation and identification***



346 *Akkermansia* isolation and identification were conducted as previously described.<sup>10</sup> Briefly, 5  
347 mL of anaerobic Basal Mucin Medium (BMM) containing 0.5% v/v mucin (Supplementary  
348 Table S1) was inoculated with fecal swabs in serum tubes and a ten-fold serial dilution up to 10<sup>-6</sup>  
349 or 10<sup>-7</sup> was performed for each sample. Cultures were incubated at 37°C for up to 5 d, and those  
350 with oval cells in pairs were further diluted in broth medium and/or transferred to BMM agar  
351 until purity could be verified microscopically using a Zeiss Axioskop or as single colonies on  
352 BMM agar. For identification, genomic DNA was extracted using the DNAeasy® UltraClean®  
353 Microbial kit Isolation Kit (Qiagen Inc., MD, USA) and the near full-length 16S rRNA gene was  
354 amplified using primers 8F (5'-AGAGTTTGATCCTGGCTCAG-3') and 1492R (5'-  
355 TACGGTTACCTTGTTACGA-3') with the GoTaq® Hot Start Colorless Master Mix (Promega  
356 Corp., Madison, WI, USA). PCR was performed using Eppendorf Vapo Protect Mastercycler Pro  
357 S 6325 (Hamburg, Germany) and included an activation/denaturation step at 95°C for 3 min,  
358 followed by 30 cycles of 95°C for 45 s, 45°C for 1 min and 72°C for 1 min 45s and a final  
359 extension step at 72°C for 7 min, followed by a hold at 4°C. PCR products were purified  
360 (QIAquick PCR Purification Kit, Qiagen Inc.) and sequenced using either the 8F or 1492R  
361 primer on an ABI Prism 3730 DNA sequencer (Laragen Sequencing and Genotyping, Culver  
362 City, CA). If sequences were pure and positively BLASTed to *A. muciniphila* in GenBank, the  
363 near full-length 16S rRNA gene was sequenced with additional primers (515F  
364 (GTGCCAGCMGCCGCGGTAA), 806R (GGACTACHVGGGTWTCTAAT), and 8F or  
365 1492R). Sequences associated with each isolate were then assembled in Geneious 7.1.3  
366 (<https://www.geneious.com>) and imported into ARB<sup>66</sup>. In ARB, sequences were manually  
367 aligned with secondary structure constraints against the 16S rRNA gene sequence of *A.*  
368 *muciniphila* Muc<sup>T</sup>. To determine phylogroup affiliation based on 16S rRNA gene sequences,



369 each isolate was added to our in-house database of *Akkermansia* 16S rRNA gene sequences as  
370 previously described.<sup>10,15</sup> Masked alignments were exported from ARB and imported into Kumar  
371 and colleagues<sup>67</sup> MEGA7 where phylogenetic reconstruction was performed using the  
372 maximum-likelihood approach.

### 373 *Genome sequencing, assembly, annotation, and phylogenomics*

374 Eleven *Akkermansia* isolates were selected for genome sequencing across three different  
375 sequencing efforts. DNA from strains CSUN-7 and CSUN-12 were sequenced according to the  
376 protocol described by Oliver and colleagues<sup>68</sup> under the ‘Illumina sequencing’ section. To obtain  
377 enough DNA for this sequencing protocol, four 5 mL overnight BMM-grown cultures were  
378 extracted as described above and extracts were pooled and concentrated using ethanol  
379 precipitation with 3M sodium acetate. Illumina sequencing libraries were then prepared as  
380 described by Oliver and colleagues. DNA from strains CSUN-17, CSUN-19, CSUN-33, and  
381 CSUN-34 were sequenced according to the methods described by Parker and colleagues.<sup>69</sup> For  
382 both this and the following sequencing efforts, enough quality genomic DNA was obtained from  
383 a single 5 mL BMM-grown culture of each isolate extracted as described above. The DNA from  
384 the remaining isolates (CSUN-37, CSUN-50, CSUN-56, CSUN-58, and CSUN-59) were  
385 sequenced on an Illumina NextSeq 550 (2x150bp) by the Microbial Genome Sequencing Center  
386 (Pittsburgh, PA, USA).

387 For assembly and annotation, paired fastq files of each isolate were submitted to PATRIC  
388 (v 3.6.3)<sup>70</sup> for their “Comprehensive Genome Analysis” workflow that uses Unicycler<sup>71</sup> to  
389 assemble genomes and RASTtk<sup>72</sup> for annotation. For comparison, the nucleotide sequence file  
390 for *A. muciniphila* Muc<sup>T</sup> ATCC BAA-835 (SAMN00138213) was downloaded from GenBank  
391 and annotated identical to the novel isolate genomes also using tools in PATRIC. To investigate

392 the carbohydrate degrading potential of each *Akkermansia* phylogroup, the assembled contigs of  
393 the new isolates (n=11) were combined with 74 publicly available *Akkermansia* genomes<sup>10,15,73</sup>  
394 and submitted to the online dbCAN meta server for CAZyme annotation<sup>27-29</sup>. dbCAN uses three  
395 tools - HMMER<sup>74</sup>, DIAMOND<sup>75</sup>, and Hotpep<sup>76</sup> - for automated CAZyme annotation.  
396 Annotations were considered only if they matched in at least two of the three tools. Individual  
397 count files were tabulated and compiled using a custom python script to generate a frequency  
398 table for all genomes (n=85). The resulting table was sorted and trimmed to include only  
399 glycoside hydrolase (GH) annotations and a heatmap was constructed in R<sup>77</sup> using the  
400 heatmap.2 function in the gplots library<sup>78</sup>. Cluster dendrograms in the heatmap were calculated  
401 using average linkage hierarchical clustering based on Bray-Curtis dissimilarity matrices  
402 calculated using the vegan package also in R<sup>79</sup>. To determine if there were differences in the  
403 number of GH predictions between phylogroups, a Kruskal-Wallis test (kruskal.test) followed by  
404 the Dunn's test (dunn.test, method='bonferroni') were performed in R.

405 For phylogenomic analysis, amino acid sequences of 49 ribosomal protein coding genes  
406<sup>80</sup> were extracted and concatenated from assembled genomes using the 'phylogenomics'  
407 workflow in anvi'o<sup>81</sup>. The concatenated fasta file was then imported into MEGA7<sup>67</sup>, aligned  
408 using MUSCLE<sup>82</sup>, and a phylogenetic tree was made using the maximum-likelihood method<sup>83</sup>  
409 with 100 bootstraps.

#### 410 ***HMO growth experiments***

411 To determine if *Akkermansia* strains could grow using HMOs, we performed a series of growth  
412 experiments in a customized medium, prepared by increasing the concentrations of threonine and  
413 tryptone (TT) in BMM<sup>9</sup>. This medium, hereafter referred to as BMM-TT (supplementary Table  
414 S1), was supplemented with individual HMOs before inoculation with the chosen *Akkermansia*

415 strains. Five HMOs were tested, namely 2'-FL, 3-FL, LNT, LNnT, and 6'-SL (Glycom,  
416 Hørsholm, Denmark). Lactose was also included in these growth experiments since it is the  
417 backbone of HMOs. Initially, representative isolates of each phylogroup (AmI = *A. muciniphila*  
418 Muc<sup>T</sup>, AmII = *Akkermansia* CSUN-17, AmIII = *Akkermansia* CSUN-56, and AmIV =  
419 *Akkermansia* CSUN-19; Supplementary Table S2) were grown overnight (18 to 24 h) in BMM at  
420 37 °C under an atmosphere of N<sub>2</sub>/CO<sub>2</sub> (70:30, vol/vol). Cultures were then standardized to an  
421 OD<sub>600nm</sub> of 0.5 in fresh BMM and used to inoculate (10%) 200 μL of BMM-TT or BMM-TT  
422 supplemented with 20 mM of each HMO (or lactose) in 96-well microtiter plates (Falcon<sup>®</sup>,  
423 Corning Incorporated, NY, USA) in triplicate. Wells were overlaid with 30 μL of filter-sterilized  
424 mineral oil to prevent evaporation over the 48-h incubation period. After 48 h of anaerobic  
425 (N<sub>2</sub>/CO<sub>2</sub>/H<sub>2</sub>; 80:15:5 [vol/vol]) incubation at 37 °C in a Bactron IV anaerobic chamber (Sheldon  
426 Manufacturing, Inc., Cornelius, OR), plates were shaken for 10 s and OD<sub>600nm</sub> was determined  
427 using a Spectramax microplate reader (Molecular Devices, San Jose, CA, USA). Growth was  
428 determined as ΔOD<sub>600nm</sub> i.e., the change in OD<sub>600nm</sub> growth in the BMM-TT supplemented with  
429 the HMOs relative to the growth in HMO-unsupplemented BMM-TT (i.e., BMM-TT + HMO  
430 OD<sub>600nm</sub> – BMM-TT OD<sub>600nm</sub>). If OD<sub>600nm</sub> were over 1.0, samples were diluted in half with a  
431 fresh medium and reread. Each experiment was conducted in triplicate and repeated at least two  
432 times. To test for differences in growth across strains, we used a repeated measures analysis of  
433 variance (ANOVA) followed by Tukey's honestly significant differences (HSD) test as  
434 appropriate. Uninoculated controls were included in each experiment and remained negative for  
435 growth.

436 To verify the degradation of three HMOs (2'-FL, LNT, and 6'-SL), the above  
437 experiments were repeated in 1.5 mL of BMM-TT supplemented with 4 mM HMO. These

438 experiments were conducted in 24-well microtiter plates (Costar, Corning Incorporated, NY,  
439 USA) sealed with Microseal® 'A' Film (Bio-Rad Laboratories, Inc., Hercules, CA, USA)  
440 instead of mineral oil. Plates were incubated and  $OD_{600nm}$  and  $\Delta OD_{600nm}$  were measured after 48  
441 h as described above. For glycoanalytics, 0.5ml aliquots were taken at time 0 and 48 h after  
442 incubation, transferred to Eppendorf tubes and centrifuged at  $10,000 \times g$  for 3 min at  $4^{\circ}C$ . The  
443 cell-free supernatants were stored at  $-20^{\circ}C$  for glycoanalytics as described below. To compare  
444 growth, statistical analysis was conducted as described above.

#### 445 *HMO quantification*

446 Culture supernatants were collected at time 0 and after 48 h of incubation to measure the  
447 degradation of 2'-FL, LNT, and 6'-SL. In addition to each parent HMO, individual sugars (with  
448 the exception of GlcNAc from LNT) of the three HMOs were also quantitatively measured using  
449 high-performance anion exchange chromatography with pulsed amperometric detection  
450 (HPAEC-PAD)<sup>84,85</sup>. Frozen, cell-free spent culture media were thawed in a water bath, vortexed  
451 thoroughly to make a uniform mixture, and centrifuged at  $7,000 \times g$  for 5 min at  $10^{\circ}C$  and  $1\mu L$   
452 of the spent culture media was injected in HPAEC-PAD for detection of the above-mentioned  
453 sugars.

454 Carbohydrate analysis was done on Dionex-ICS3000 (Thermo Scientific, Sunnyvale, CA,  
455 USA) using CarboPac PA-1 column (4 mm x 250 mm) attached with Carbo PA1-guard column  
456 (4 mm x 50 mm). Detection of monosaccharides and oligosaccharides was done using standard  
457 Quad potential for carbohydrate analysis as supplied by the manufacturer. A gradient mixture of  
458 two solvents along with HPLC grade water was used for optimum separation of  
459 monosaccharides and oligosaccharides present in the sample. Solvent-A (Water), Solvent-B (100

460 mM NaOH + 7 mM NaOAc) and Solvent-C (100 mM NaOH + 250 mM NaOAc) were used as  
461 elution solvents at a flow rate of 1.0 mL/min. Gradient mixture details are given in  
462 Supplementary Table S4. Sugars were quantified by comparing with the area under the peaks  
463 from a standard mixture of fucose, galactose, glucose, 3-FL, lactose, 2'-FL, LNnT, LNT, sialic  
464 acid (Neu5Ac), 6'-SL, and 3-SL. Representative chromatograms are presented in Supplemental  
465 Figure S1. To determine the percent of HMOs utilized, the amount remaining after 48 h of  
466 incubation was divided by the amount at time 0 and multiplied by  $[100 - (\text{HMO 48 h} / \text{HMO 0 h})]$   
467  $\times 100$ .

468

#### 469 **Acknowledgements**

470 The authors would like to thank Louise Vigsnaes and Glycom for their generous donation of  
471 HMOs and their continued support of our work.

#### 472 **Disclosure Statement**

473 The authors declare no conflict of interests.

#### 474 **Author Contributions**

475 E.L. helped conceive the project, conducted all HMO growth experiments, aided in data  
476 interpretation, and helped write the manuscript. S.G.P. performed statistical analysis, aided in  
477 data interpretation, and helped write the manuscript. N.K. helped conceive the project and write  
478 the manuscript. S.H., E.H., M.H., A.K., C.M., K.O., L.P., K.R., and P.S. helped collect samples  
479 and isolate *Akkermansia* strains. E.S. helped with the genomic analysis. B.C. and M.P.

480 performed the glycoanalytics and helped with data interpretation. C.T.P and K.C. performed  
481 genome sequencing and helped with genomic analysis. G.E.F. conceived of the project, aided in  
482 data interpretation, performed genomic and statistical analysis, and helped write the paper.

### 483 **Supplementary material**

484 Supplemental data for this article can be accessed on the publisher's website.

### 485 **Data availability statement**

486 The data that support the findings of this study are openly available in NCBI BioProject database  
487 at <https://www.ncbi.nlm.nih.gov/bioproject/609771>, accession number [PRJNA609771].

### 488 **Funding**

489 Research reported in this publication was supported by the National Institute of General Medical  
490 Sciences (NIGMS) of the National Institutes of Health under Award Numbers SC2GM122620  
491 and SC1GM136546 awarded to G.E.F., S.H., N.K., C.M., K.O., K.R., and P.S. were supported  
492 under grant TL4GM118977, RL5GM118975, and UL1GM118976 also from the NIGMS. The  
493 content is solely the responsibility of the authors and does not necessarily represent the official  
494 views of the National Institutes of Health.

495

### 496 **References**

497 1. Derrien M, Vaughan EE, Plugge CM, de Vos WM. *Akkermansia muciniphila* gen. nov.,  
498 sp. nov., a human intestinal mucin-degrading bacterium. *Int J Syst Evol Microbiol.* 2004;  
499 54:1469-76.

- 500 2. Kim S, Shin Y-C, Kim T-Y, Kim Y, Lee Y-S, Lee S-H, et al. Mucin degrader  
501 *Akkermansia muciniphila* accelerates intestinal stem cell-mediated epithelial development. Gut  
502 Microbes 2021; 13:1-20.
- 503 3. Dao MC, Everard A, Aron-Wisnewsky J, Sokolovska N, Prifti E, Verger EO, et al.  
504 *Akkermansia muciniphila* and improved metabolic health during a dietary intervention in  
505 obesity: relationship with gut microbiome richness and ecology. Gut 2016; 65:426-36.
- 506 4. Rajilic-Stojanovic M, Shanahan F, Guarner F, de Vos WM. Phylogenetic analysis of  
507 dysbiosis in ulcerative colitis during remission. Inflamm Bowel Dis. 2013; 19:481-8.
- 508 5. Png CW, Linden SK, Gilshenan KS, Zoetendal EG, McSweeney CS, Sly LI, et al.  
509 Mucolytic bacteria with increased prevalence in IBD mucosa augment *in vitro* utilization of  
510 mucin by other bacteria. Am J Gastroenterol. 2010; 105:2420-8.
- 511 6. Lee M-J, Kang M-J, Lee S-Y, Lee E, Kim K, Won S, et al. Perturbations of gut  
512 microbiome genes in infants with atopic dermatitis according to feeding type. J Allergy Clin  
513 Immunol. 2018; 141:1310-9.
- 514 7. Ouwerkerk JP, van der Ark KCH, Davids M, Claassens NJ, Finestra TR, de Vos WM, et  
515 al. Adaptation of *Akkermansia muciniphila* to the oxic-anoxic interface of the mucus layer. Appl  
516 Environ Microbiol. 2016; 82:6983-93.
- 517 8. Robbe C, Capon C, Coddeville B, Michalski JC. Structural diversity and specific  
518 distribution of O-glycans in normal human mucins along the intestinal tract. Biochem J. 2004;  
519 384:307-16.
- 520 9. Ottman N, Davids M, Suarez-Diez M, Boeren S, Schaap PJ, Martins Dos Santos VAP, et  
521 al. Genome-scale model and omics analysis of metabolic capacities of *Akkermansia muciniphila*  
522 reveal a preferential mucin-degrading lifestyle. Appl Environ Microbiol. 2017; 83.
- 523 10. Kirmiz N, Galindo K, Cross KL, Luna E, Rhoades N, Podar M, et al. Comparative  
524 genomics guides elucidation of vitamin B12 biosynthesis in novel human-associated  
525 *Akkermansia* strains. Appl Environ Microbiol. 2020; 86:e02117-19.
- 526 11. Chia LW, Hornung BVH, Aalvink S, Schaap PJ, de Vos WM, Knol J, et al. Deciphering  
527 the trophic interaction between *Akkermansia muciniphila* and the butyrogenic gut commensal  
528 *Anaerostipes caccae* using a metatranscriptomic approach. Antonie Van Leeuwenhoek 2018;  
529 111:859-73.

- 530 12. Cani PD, Van Hul M, Lefort C, Depommier C, Rastelli M, Everard A. Microbial  
531 regulation of organismal energy homeostasis. *Nat Metab.* 2019; 1:34-46.
- 532 13. Ottman N, Reunanen J, Meijerink M, Pietila TE, Kainulainen V, Klievink J, et al. Pili-  
533 like proteins of *Akkermansia muciniphila* modulate host immune responses and gut barrier  
534 function. *PLoS ONE* 2017; 12:e0173004.
- 535 14. Plovier H, Everard A, Druart C, Depommier C, Van Hul M, Geurts L, et al. A purified  
536 membrane protein from *Akkermansia muciniphila* or the pasteurized bacterium improves  
537 metabolism in obese and diabetic mice. *Nat Med.* 2017; 23:107-13.
- 538 15. Guo X, Li S, Zhang J, Wu F, Li X, Wu D, et al. Genome sequencing of 39 *Akkermansia*  
539 *muciniphila* isolates reveals its population structure, genomic and functional diversity, and  
540 global distribution in mammalian gut microbiotas. *BMC Genom.* 2017; 18:800.
- 541 16. Bode L. Human milk oligosaccharides: every baby needs a sugar mama. *Glycobiology*  
542 2012; 22:1147-62.
- 543 17. Coker JK, Moyne O, Rodionov DA, Zengler K. Carbohydrates great and small, from  
544 dietary fiber to sialic acids: How glycans influence the gut microbiome and affect human health.  
545 *Gut Microbes* 2021; 13:1869502.
- 546 18. Bode L, Jantscher-Krenn E. Structure-function relationships of human milk  
547 oligosaccharides. *Adv Nutr.* 2012; 3:383s-91s.
- 548 19. Kunz C, Rudloff S, Baier W, Klein N, Strobel S. Oligosaccharides in human milk:  
549 structural, functional, and metabolic aspects. *Annu Rev Nutr.* 2000; 20:699-722.
- 550 20. Garrido D, Barile D, Mills DA. A molecular basis for bifidobacterial enrichment in the  
551 infant gastrointestinal tract. *Adv Nutr.* 2012; 3:415S-21S.
- 552 21. Kuntz S, Kunz C, Rudloff S. Oligosaccharides from human milk induce growth arrest via  
553 G2/M by influencing growth-related cell cycle genes in intestinal epithelial cells. *Br J Nutr.*  
554 2009; 101:1306-15.
- 555 22. Morrow AL, Ruiz-Palacios GM, Jiang X, Newburg DS. Human-milk glycans that inhibit  
556 pathogen binding protect breast-feeding infants against infectious diarrhea. *J Nutr.* 2005;  
557 135:1304-7.
- 558 23. Ward RE, Niñonuevo M, Mills DA, Lebrilla CB, German JB. *In vitro* fermentation of  
559 breast milk oligosaccharides by *Bifidobacterium infantis* and *Lactobacillus gasseri*. *Appl*  
560 *Environ Microbiol.* 2006; 72:4497-9.



- 561 24. Marcobal A, Barboza M, Froehlich JW, Block DE, German JB, Lebrilla CB, et al.  
562 Consumption of human milk oligosaccharides by gut-related microbes. *J Agric Food Chem*.  
563 2010; 58:5334-40.
- 564 25. Yu ZT, Chen C, Newburg DS. Utilization of major fucosylated and sialylated human  
565 milk oligosaccharides by isolated human gut microbes. *Glycobiology* 2013; 23:1281-92.
- 566 26. Kostopoulos I, Elzinga J, Ottman N, Klievink JT, Blijenberg B, Aalvink S, et al.  
567 *Akkermansia muciniphila* uses human milk oligosaccharides to thrive in the early life conditions  
568 *in vitro*. *Sci Rep*. 2020; 10:14330.
- 569 27. Cantarel BL, Coutinho PM, Rancurel C, Bernard T, Lombard V, Henrissat B. The  
570 Carbohydrate-Active EnZymes database (CAZy): an expert resource for glycogenomics. *Nucleic*  
571 *Acids Res*. 2009; 37:D233-8.
- 572 28. Yin Y, Mao X, Yang J, Chen X, Mao F, Xu Y. dbCAN: a web resource for automated  
573 carbohydrate-active enzyme annotation. *Nucleic Acids Res*. 2012; 40:W445-W51.
- 574 29. Zhang H, Yohe T, Huang L, Entwistle S, Wu P, Yang Z, et al. dbCAN2: a meta server  
575 for automated carbohydrate-active enzyme annotation. *Nucleic Acids Res*. 2018; 46:W95-W101.
- 576 30. Tailford LE, Crost EH, Kavanaugh D, Juge N. Mucin glycan foraging in the human gut  
577 microbiome. *Front Genet*. 2015; 6.
- 578 31. Katoh T, Ojima MN, Sakanaka M, Ashida H, Gotoh A, Katayama T. Enzymatic  
579 adaptation of *Bifidobacterium bifidum* to host glycans, viewed from glycoside hydrolyases and  
580 carbohydrate-binding modules. *Microorganisms* 2020; 8.
- 581 32. Low KE, Smith SP, Abbott DW, Boraston AB. The glycoconjugate-degrading enzymes  
582 of *Clostridium perfringens*: Tailored catalysts for breaching the intestinal mucus barrier.  
583 *Glycobiology* 2020.
- 584 33. Ioannou A, Knol J, Belzer C. Microbial glycoside hydrolases in the first year of life: an  
585 analysis review on their presence and importance in infant gut. *Front Microbiol*. 2021; 12:1345.
- 586 34. Chen H, Kim J, Kendall DA. Competition between functional signal peptides  
587 demonstrates variation in affinity for the secretion pathway. *J Bacteriol*. 1996; 178:6658-64.
- 588 35. Owji H, Nezafat N, Negahdaripour M, Hajiebrahimi A, Ghasemi Y. A comprehensive  
589 review of signal peptides: Structure, roles, and applications. *Eur J Cell Biol*. 2018; 97:422-41.
- 590 36. Zhai Q, Feng S, Arjan N, Chen W. A next generation probiotic, *Akkermansia*  
591 *muciniphila*. *Crit Rev Food Sci Nutr*. 2019; 59:3227-36.

- 592 37. Becken B, Davey L, Middleton DR, Mueller KD, Sharma A, Holmes ZC, et al.  
593 Genotypic and phenotypic diversity among human isolates of *Akkermansia muciniphila*. mBio  
594 2021; 12:e00478-21.
- 595 38. Sela DA, Garrido D, Lerno L, Wu S, Tan K, Eom H-J, et al. *Bifidobacterium longum*  
596 subsp. *infantis* ATCC 15697  $\alpha$ -fucosidases are active on fucosylated human milk  
597 oligosaccharides. Appl Environ Microbiol. 2012; 78:795-803.
- 598 39. Kiyohara M, Tanigawa K, Chaiwangsri T, Katayama T, Ashida H, Yamamoto K. An  
599 exo-alpha-sialidase from bifidobacteria involved in the degradation of sialyloligosaccharides in  
600 human milk and intestinal glycoconjugates. Glycobiology 2011; 21:437-47.
- 601 40. Sela DA, Li Y, Lerno L, Wu S, Marcobal AM, German JB, et al. An infant-associated  
602 bacterial commensal utilizes breast milk sialyloligosaccharides. J Biol Chem. 2011; 286:11909-  
603 18.
- 604 41. Matsuki T, Yahagi K, Mori H, Matsumoto H, Hara T, Tajima S, et al. A key genetic  
605 factor for fucosyllactose utilization affects infant gut microbiota development. Nat Commun.  
606 2016; 7:11939.
- 607 42. James K, Motherway MO, Bottacini F, van Sinderen D. *Bifidobacterium breve* UCC2003  
608 metabolises the human milk oligosaccharides lacto-N-tetraose and lacto-N-neo-tetraose through  
609 overlapping, yet distinct pathways. Sci Rep. 2016; 6:38560.
- 610 43. Garrido D, Ruiz-Moyano S, Kirmiz N, Davis JC, Totten SM, Lemay DG, et al. A novel  
611 gene cluster allows preferential utilization of fucosylated milk oligosaccharides in  
612 *Bifidobacterium longum* subsp. *longum* SC596. Sci Rep. 2016; 6:35045.
- 613 44. Marcobal A, Barboza M, Sonnenburg ED, Pudlo N, Martens EC, Desai P, et al.  
614 *Bacteroides* in the infant gut consume milk oligosaccharides via mucus-utilization pathways.  
615 Cell Host Microbe 2011; 10:507-14.
- 616 45. Garrido D, Kim JH, German JB, Raybould HE, Mills D. Oligosaccharide binding  
617 proteins from *Bifidobacterium longum* subsp. *infantis* reveal a preference for host glycans. PLoS  
618 ONE 2011; 6.
- 619 46. Yoshida E, Sakurama H, Kiyohara M, Nakajima M, Kitaoka M, Ashida H, et al.  
620 *Bifidobacterium longum* subsp. *infantis* uses two different  $\beta$ -galactosidases for selectively  
621 degrading type-1 and type-2 human milk oligosaccharides. Glycobiology 2012; 22:361-8.

- 622 47. Ruiz-Moyano S, Totten SM, Garrido D, Smilowitz JT, German JB, Lebrilla CB.  
623 Variation in consumption of human milk oligosaccharides by infant gut-associated strains of  
624 *Bifidobacterium breve*. Appl Environ Microbiol. 2013; 79.
- 625 48. Turrone F, Bottacini F, Foroni E, Mulder I, Kim JH, Zomer A, et al. Genome analysis of  
626 *Bifidobacterium bifidum* PRL2010 reveals metabolic pathways for host-derived glycan foraging.  
627 Proc Natl Acad Sci U S A. 2010; 107:19514-9.
- 628 49. Marcobal A, Sonnenburg JL. Human milk oligosaccharide consumption by intestinal  
629 microbiota. Clin Microbiol Infect. 2012; 18:12-5.
- 630 50. Sampson EM, Bobik TA. Microcompartments for B12-dependent 1,2-propanediol  
631 degradation provide protection from dna and cellular damage by a reactive metabolic  
632 intermediate. J Bacteriol. 2008; 190:2966-71.
- 633 51. Engels C, Ruscheweyh H-J, Beerenwinkel N, Lacroix C, Schwab C. The common gut  
634 microbe *Eubacterium hallii* also contributes to intestinal propionate formation. Front Microbiol.  
635 2016; 7.
- 636 52. Yatsunenkov T, Rey FE, Manary MJ, Trehan I, Dominguez-Bello MG, Contreras M, et al.  
637 Human gut microbiome viewed across age and geography. Nature 2012; 486:222-7.
- 638 53. Collado MC, Derrien M, Isolauri E, de Vos WM, Salminen S. Intestinal Integrity and  
639 *Akkermansia muciniphila*, a mucin-degrading member of the intestinal microbiota present in  
640 infants, adults, and the elderly. Appl Environ Microbiol. 2007; 73:7767-70.
- 641 54. Collado MC, Laitinen K, Salminen S, Isolauri E. Maternal weight and excessive weight  
642 gain during pregnancy modify the immunomodulatory potential of breast milk. Pediatr Res.  
643 2012; 72:77-85.
- 644 55. Lackey KA, Williams JE, Meehan CL, Zachek JA, Benda ED, Price WJ, et al. What's  
645 normal? Microbiomes in human milk and infant feces are related to each other but vary  
646 geographically: The INSPIRE study. Front Nutr. 2019; 6:45.
- 647 56. Korpela K, Salonen A, Hickman B, Kunz C, Sprenger N, Kukkonen K, et al. Fucosylated  
648 oligosaccharides in mother's milk alleviate the effects of caesarean birth on infant gut microbiota.  
649 Sci Rep. 2018; 8:13757.
- 650 57. Aakko J, Kumar H, Rautava S, Wise A, Autran C, Bode L, et al. Human milk  
651 oligosaccharide categories define the microbiota composition in human colostrum. Benef  
652 Microbes 2017; 8:563-7.

- 653 58. Thurl S, Munzert M, Henker J, Boehm G, Müller-Werner B, Jelinek J, et al. Variation of  
654 human milk oligosaccharides in relation to milk groups and lactational periods. *Br J Nutr* 2010;  
655 104:1261-71.
- 656 59. Wang B, Brand-Miller J. The role and potential of sialic acid in human nutrition. *Eur J*  
657 *Clin Nutr.* 2003; 57:1351-69.
- 658 60. Charbonneau MR, O'Donnell D, Blanton LV, Totten SM, Davis JCC, Barratt MJ, et al.  
659 Sialylated Milk Oligosaccharides Promote Microbiota-Dependent Growth in Models of Infant  
660 Undernutrition. *Cell* 2016; 164:859-71.
- 661 61. Jacobi SK, Yatsunenkov T, Li D, Dasgupta S, Yu RK, Berg BM, et al. Dietary isomers of  
662 sialyllactose increase ganglioside sialic acid concentrations in the corpus callosum and  
663 cerebellum and modulate the colonic microbiota of formula-fed piglets. *J Nutr.* 2016; 146:200-8.
- 664 62. Almagro-Moreno S, Boyd EF. Bacterial catabolism of nonulosonic (sialic) acid and  
665 fitness in the gut. *Gut Microbes* 2010; 1:45-50.
- 666 63. Egan M, O'Connell Motherway M, Ventura M, van Sinderen D. Metabolism of sialic acid  
667 by *Bifidobacterium breve* UCC2003. *Appl Environ Microbiol.* 2014; 80:4414-26.
- 668 64. van der Ark KCH, Aalvink S, Suarez-Diez M, Schaap PJ, de Vos WM, Belzer C. Model-  
669 driven design of a minimal medium for *Akkermansia muciniphila* confirms mucus adaptation.  
670 *Microb Biotechnol.* 2018; 11:476-85.
- 671 65. Rokhsfat S, Lin A, Comelli EM. Mucin–Microbiota Interaction During Postnatal  
672 Maturation of the Intestinal Ecosystem: Clinical Implications. *Dig Dis Sci.* 2016; 61:1473-86.
- 673 66. Ludwig W, Strunk O, Westram R, Richter L, Meier H, Yadhukumar, et al. ARB: a  
674 software environment for sequence data. *Nucleic Acids Res.* 2004; 32:1363-71.
- 675 67. Kumar S, Stecher G, Tamura K. MEGA7: Molecular Evolutionary Genetics Analysis  
676 Version 7.0 for Bigger Datasets. *Mol Biol Evol.* 2016; 33:1870-4.
- 677 68. Oliver A, Kay M, Cooper KK. Comparative genomics of cocci-shaped *Sporosarcina*  
678 strains with diverse spatial isolation. *BMC Genom.* 2018; 19:310.
- 679 69. Parker CT, Cooper KK, Huynh S, Smith TP, Bono JL, Cooley M. Genome sequences of  
680 eight shiga toxin-producing *Escherichia coli* strains isolated from a produce-growing region in  
681 California. *Microbiol Resour Announc.* 2018; 7.

- 682 70. Wattam AR, Davis JJ, Assaf R, Boisvert S, Brettin T, Bun C, et al. Improvements to  
683 PATRIC, the all-bacterial bioinformatics database and analysis resource center. *Nucleic Acids*  
684 *Res.* 2017; 45:D535-d42.
- 685 71. Wick RR, Judd LM, Gorrie CL, Holt KE. Unicycler: Resolving bacterial genome  
686 assemblies from short and long sequencing reads. *PLoS Comput Biol.* 2017; 13:e1005595.
- 687 72. Brettin T, Davis JJ, Disz T, Edwards RA, Gerdes S, Olsen GJ, et al. RASTtk: a modular  
688 and extensible implementation of the RAST algorithm for building custom annotation pipelines  
689 and annotating batches of genomes. *Sci Rep.* 2015; 5:8365.
- 690 73. van Passel MW, Kant R, Zoetendal EG, Plugge CM, Derrien M, Malfatti SA, et al. The  
691 genome of *Akkermansia muciniphila*, a dedicated intestinal mucin degrader, and its use in  
692 exploring intestinal metagenomes. *PLoS ONE* 2011; 6:e16876.
- 693 74. Finn RD, Clements J, Eddy SR. HMMER web server: interactive sequence similarity  
694 searching. *Nucleic Acids Res.* 2011; 39:W29-37.
- 695 75. Buchfink B, Xie C, Huson DH. Fast and sensitive protein alignment using DIAMOND.  
696 *Nat Methods* 2015; 12:59-60.
- 697 76. Busk PK, Pilgaard B, Lezyk MJ, Meyer AS, Lange L. Homology to peptide pattern for  
698 annotation of carbohydrate-active enzymes and prediction of function. *BMC Bioinform.* 2017;  
699 18:214.
- 700 77. R Core Team. R: A language and environment for statistical computing. Vienna, Austria:  
701 R Foundation for Statistical Computing, 2013.
- 702 78. Warnes G, Bolker B, Bonebakker L, Gentleman R, Huber W, Liaw A, et al. gplots:  
703 Various R programming tools for plotting data. [https://cran.r-](https://cran.r-project.org/web/packages/gplots/index.html)  
704 [project.org/web/packages/gplots/index.html](https://cran.r-project.org/web/packages/gplots/index.html), 2009.
- 705 79. Oksanen J, Guillaume Blanchet F, Friendly M, Kindt R, Legendre P, McGlenn D, et al.  
706 vegan: community ecology package. In: 2.4-3. Rpv, ed. [https://CRAN.R-](https://CRAN.R-project.org/package=vegan)  
707 [project.org/package=vegan](https://CRAN.R-project.org/package=vegan), 2017.
- 708 80. Campbell JH, O'Donoghue P, Campbell AG, Schwientek P, Sczyrba A, Woyke T, et al.  
709 UGA is an additional glycine codon in uncultured SR1 bacteria from the human microbiota. *Proc*  
710 *Natl Acad Sci U S A.* 2013; 110:5540-5.
- 711 81. Eren AM, Esen OC, Quince C, Vineis JH, Morrison HG, Sogin ML, et al. Anvi'o: an  
712 advanced analysis and visualization platform for 'omics data. *PeerJ* 2015; 3:e1319.

- 713 82. Edgar RC. MUSCLE: multiple sequence alignment with high accuracy and high  
714 throughput. *Nucleic Acids Res.* 2004; 32:1792-7.
- 715 83. Jones DT, Taylor WR, Thornton JM. The rapid generation of mutation data matrices  
716 from protein sequences. *Comput Appl Biosci.* 1992; 8:275-82.
- 717 84. Hardy MR, Townsend RR, Lee YC. Monosaccharide analysis of glycoconjugates by  
718 anion exchange chromatography with pulsed amperometric detection. *Anal Biochem.* 1988;  
719 170:54-62.
- 720 85. Townsend RR, Hardy MR, Cumming DA, Carver JP, Bendiak B. Separation of branched  
721 sialylated oligosaccharides using high-pH anion-exchange chromatography with pulsed  
722 amperometric detection. *Anal Biochem.* 1989; 182:1-8.
- 723

724 **Figure Legends**

725

726 **Figure 1.** Phylogenetic relationship of *Akkermansia* isolates based on near-full length 16S rRNA  
727 gene sequences (**A**) and concatenation of 49 ribosomal protein coding genes obtained from draft  
728 genomes (**B**). Both trees are rooted using the only other named species of the genera, *A.*  
729 *glycaniphila* Py<sup>T</sup>. Isolates with triangles were used in HMO growth experiments. GP22 and  
730 GP24 in the AmIII phylogroup are from Guo and colleagues<sup>15</sup> and are included because only  
731 one AmIII representative is available in our culture collection. Both trees were generated in  
732 MEGA7<sup>67</sup> using the maximum likelihood method and numbers at nodes indicate bootstrap  
733 values for 100 replicates. The tree in **A** was generated considering only unambiguously aligned  
734 nucleotide positions (n=1,305). For **B**, a total of 7,327 amino acid positions across 49 protein-  
735 coding genes were used. Both trees are drawn to scale with branch lengths measured in the  
736 number of substitutions per site.

737

738 **Figure 2.** Human-associated *Akkermansia* possess different complements of glycoside hydrolase  
739 (GH) genes potentially impacting their carbohydrate degrading capabilities. The heat map shows  
740 the counts of different GH families present in the draft genome of 85 total *Akkermansia*  
741 genomes. Genomes labeled with ‘CSUN’ prefixes are isolates from this work while the ‘CDI’  
742 genomes are from metagenome assembled genomes<sup>10</sup> and the ‘GP’ or ‘BSM’ genomes are from  
743 isolates from Guo and colleagues<sup>15</sup>. Each genome is colored by phylogroup affiliation with  
744 green = AmI, blue = AmII, orange = AmIII, and red = AmIV. Only three genomes (CDI-148A-8,  
745 BSH05, and BSH01) tree outside of their phylogroup affiliation based on the GH content.  
746 Genomes with asterisks were used in the HMO growth experiments.

747



748

749 **Figure 3.** Representative strains from the four *Akkermansia* phylogroups were incubated in a  
750 mucin-containing medium alone or supplemented with 20 mM of individual human milk  
751 oligosaccharides or lactose. The experiment was conducted in triplicate and repeated at least two  
752 times. The difference in OD<sub>600nm</sub> from the growth in the mucin-containing medium alone was  
753 used to plot the bacterial growth for each strain. Values are expressed as average +/- standard  
754 deviation. The ANOVA tests reveal significant effects denoted by \*\*, P < 0.01 and \* P < 0.05  
755 with the substrates 2'-fucosyllactose (2'-FL), 3-fucosyllactose (3-FL), lacto-N-neotetraose  
756 (LNnT), and 6'-sialyllactose (6'-SL) but not with lacto-N-tetraose (LNT) and lactose. Pairwise  
757 comparisons within each substrate using Tukey's Honestly Significant Difference test reveal  
758 significant differences between the phylogroups (P < 0.05) - means showing letters in common  
759 are not significantly different.

760

761 **Figure 4.** Representative strains from the four *Akkermansia* phylogroups were incubated in a  
762 mucin-containing medium alone or supplemented with 4 mM of individual human milk  
763 oligosaccharides (HMOs) or lactose. The experiment was conducted in triplicate and repeated  
764 three times. (a) The difference in growth in the HMO-supplemented medium from the growth in  
765 the mucin-containing medium alone was used to plot the bacterial growth for each strain. (b) The  
766 concentrations of the original substrate analyzed were used to calculate the percentage of the  
767 HMO utilized. (c,d,e) The concentrations of the metabolites obtained after the deconstruction of  
768 the 2'-fucosyllactose (2'-FL), lacto-N-tetraose (LNT) and 6'-sialyllactose (6'-SL) respectively  
769 are expressed as average +/- standard deviation. Statistical analysis revealed significant effects  
770 between substrates (a,b) and strains (b,c,d), denoted by \*\*\*, P < 0.001; \*\*, P < 0.01 and \*, P <



771 0.05. Pairwise comparisons using Tukey's Honestly Significant Difference test were also  
772 performed with  $P < 0.05$ , and means showing letters in common are not significantly different.  
773

1 **Table 1.** Genomic properties of 11 human-associated *Akkermansia* isolates. For comparison, the fasta sequence of the type strain *Akkermansia*  
2 *muciniphila* Muc<sup>T</sup> was downloaded from GenBank accession number CP001071.1 and analyzed identically to the new isolates.

| Strain                                       | Contigs | GC             | Genome         |       | tRNA | rRNA | Hypothetical<br>proteins | Proteins            | EC number<br>assignments | GO          | KEGG     |
|----------------------------------------------|---------|----------------|----------------|-------|------|------|--------------------------|---------------------|--------------------------|-------------|----------|
|                                              |         | Content<br>(%) | Length<br>(bp) | CDs   |      |      |                          | with<br>assignments |                          | assignments | pathways |
| <i>A. muciniphila</i> Muc <sup>T</sup> (AmI) | 1       | 55.8           | 2,664,102      | 2,576 | 53   | 3    | 1,072                    | 1,504               | 620                      | 529         | 459      |
| <i>Akkermansia</i> CSUN-7 (AmI)              | 52      | 55.1           | 2,875,736      | 2,880 | 50   | 3    | 1,377                    | 1,503               | 623                      | 530         | 464      |
| <i>Akkermansia</i> CSUN-12 (AmI)             | 56      | 55.3           | 2,810,203      | 2,823 | 50   | 3    | 1,307                    | 1,516               | 632                      | 538         | 465      |
| <i>Akkermansia</i> CSUN-33 (AmI)             | 49      | 55.3           | 2,833,117      | 2,853 | 50   | 3    | 1,307                    | 1,546               | 633                      | 541         | 469      |
| <i>Akkermansia</i> CSUN-59 (AmI)             | 65      | 55.2           | 2,942,175      | 3,010 | 50   | 3    | 1,472                    | 1,538               | 628                      | 535         | 466      |
| <i>Akkermansia</i> CSUN-17 (AmII)            | 29      | 58.2           | 2,999,178      | 2,856 | 49   | 3    | 1,354                    | 1,502               | 641                      | 542         | 474      |
| <i>Akkermansia</i> CSUN-34 (AmII)            | 87      | 57.8           | 3,024,116      | 2,949 | 47   | 3    | 1,451                    | 1,498               | 640                      | 538         | 473      |
| <i>Akkermansia</i> CSUN-50 (AmII)            | 23      | 58.2           | 3,005,559      | 2,842 | 49   | 3    | 1,365                    | 1,477               | 632                      | 533         | 470      |
| <i>Akkermansia</i> CSUN-58 (AmII)            | 71      | 57.8           | 3,087,515      | 2,988 | 49   | 3    | 1,489                    | 1,499               | 637                      | 535         | 472      |
| <i>Akkermansia</i> CSUN-56 (AmIII)           | 48      | 58.5           | 2,860,685      | 2,658 | 48   | 3    | 1,246                    | 1,412               | 612                      | 518         | 462      |
| <i>Akkermansia</i> CSUN-19 (AmIV)            | 89      | 56.6           | 3,149,202      | 3,111 | 49   | 3    | 1,656                    | 1,455               | 628                      | 535         | 472      |
| <i>Akkermansia</i> CSUN-37 (AmIV)            | 72      | 56.7           | 3,142,630      | 3,077 | 49   | 3    | 1,631                    | 1,446               | 624                      | 531         | 469      |

3

4 CDs = coding sequences, EC = Enzyme Classification, GO = Gene Ontology, KEGG = Kyoto Encyclopedia of Genes and Genomes

5

**Table 2.** Copy number of several human milk oligosaccharide-associated glycoside hydrolase (GH) families in representative strains from the different *Akkermansia* phylogroups. The average copy number for each phylogroup is given in parentheses.

| Glycoside |                                                                              | <i>A. muciniphila</i>  | CSUN-17   | CSUN-56 | CSUN-19 |
|-----------|------------------------------------------------------------------------------|------------------------|-----------|---------|---------|
| Hydrolase | Enzyme activity                                                              | Muc <sup>T</sup> (AmI) | (AmII)    | (AmIII) | (AmIV)  |
| Family    |                                                                              |                        |           |         |         |
| GH2       | $\beta$ -galactosidase (or similar)                                          | 6 (6.3)                | 6 (6)     | 6 (6)   | 7 (6.9) |
| GH16      | $\beta$ -galactosidase (or similar)                                          | 3 (2.9)                | 3 (2.9)   | 2 (2)   | 2 (2)   |
| GH18      | Chitinase; endo- $\beta$ -N-acetylglucosaminidase (or similar)               | 1 (0.5)                | 2 (1.9)   | 2 (2)   | 2 (2)   |
| GH20      | $\beta$ -hexosaminidase; lacto-N-biosidase; $\beta$ -N-acetylglucosaminidase | 11 (11)                | 13 (12.8) | 12 (12) | 11 (11) |
| GH29      | $\alpha$ -L-fucosidase                                                       | 4 (3.8)                | 5 (4.7)   | 5 (5)   | 6 (5.9) |
| GH33      | Sialidase (or similar)                                                       | 3 (3)                  | 4 (3.9)   | 5 (4.3) | 4 (3.9) |
| GH35      | $\beta$ -galactosidase; exo- $\beta$ -glucosaminidase                        | 2 (2)                  | 2 (2)     | 2 (2)   | 2 (2)   |
| GH84      | N-acetyl $\beta$ -glucosaminidase; hyaluronidase                             | 1 (1.9)                | 2 (2)     | 2 (2)   | 2 (2)   |
| GH95      | $\alpha$ -L-fucosidase; $\alpha$ -L-galactosidase                            | 2 (2)                  | 3 (3)     | 3 (3)   | 3 (3)   |
| GH109     | $\alpha$ -N-acetylgalactosaminidase; $\beta$ -N-acetylhexosaminidase         | 2 (2)                  | 2 (2)     | 2 (2)   | 2 (2)   |
| GH141     | $\alpha$ -L-fucosidase; xylanase                                             | 1 (0.8)                | 0 (0)     | 1 (0.3) | 0 (0)   |

a

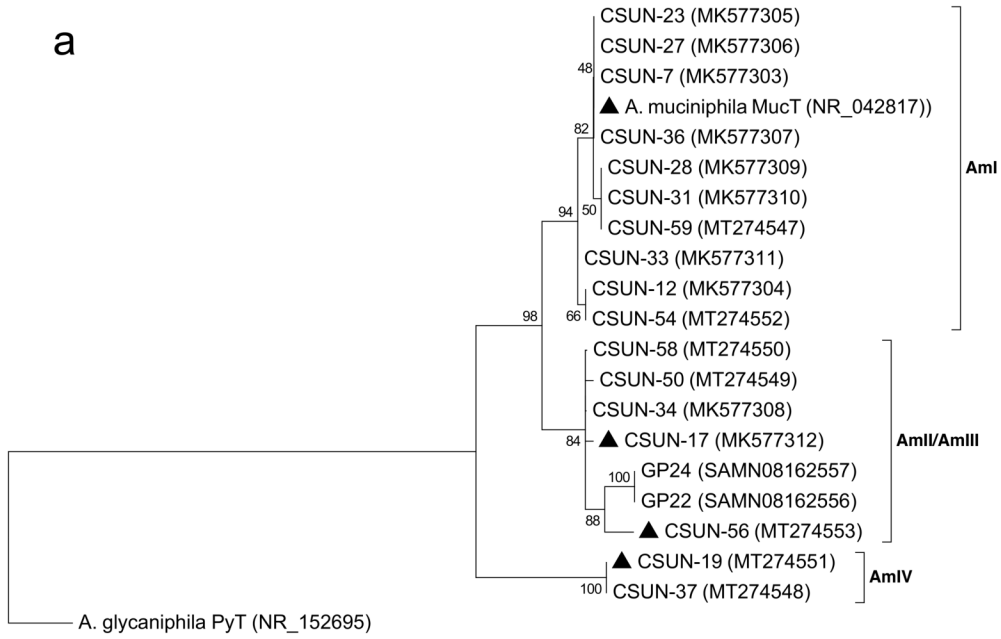

b

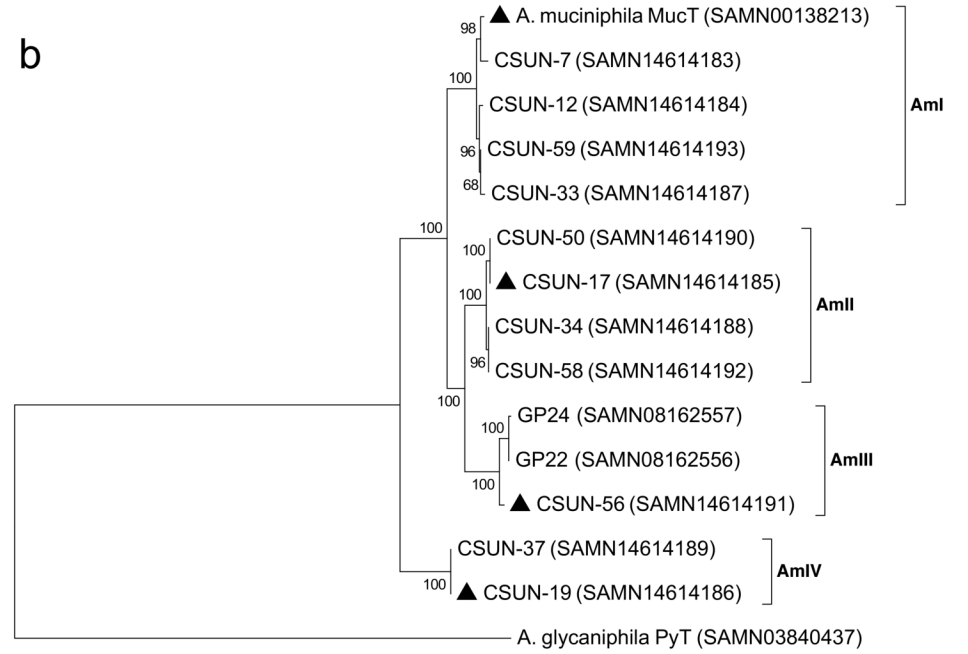

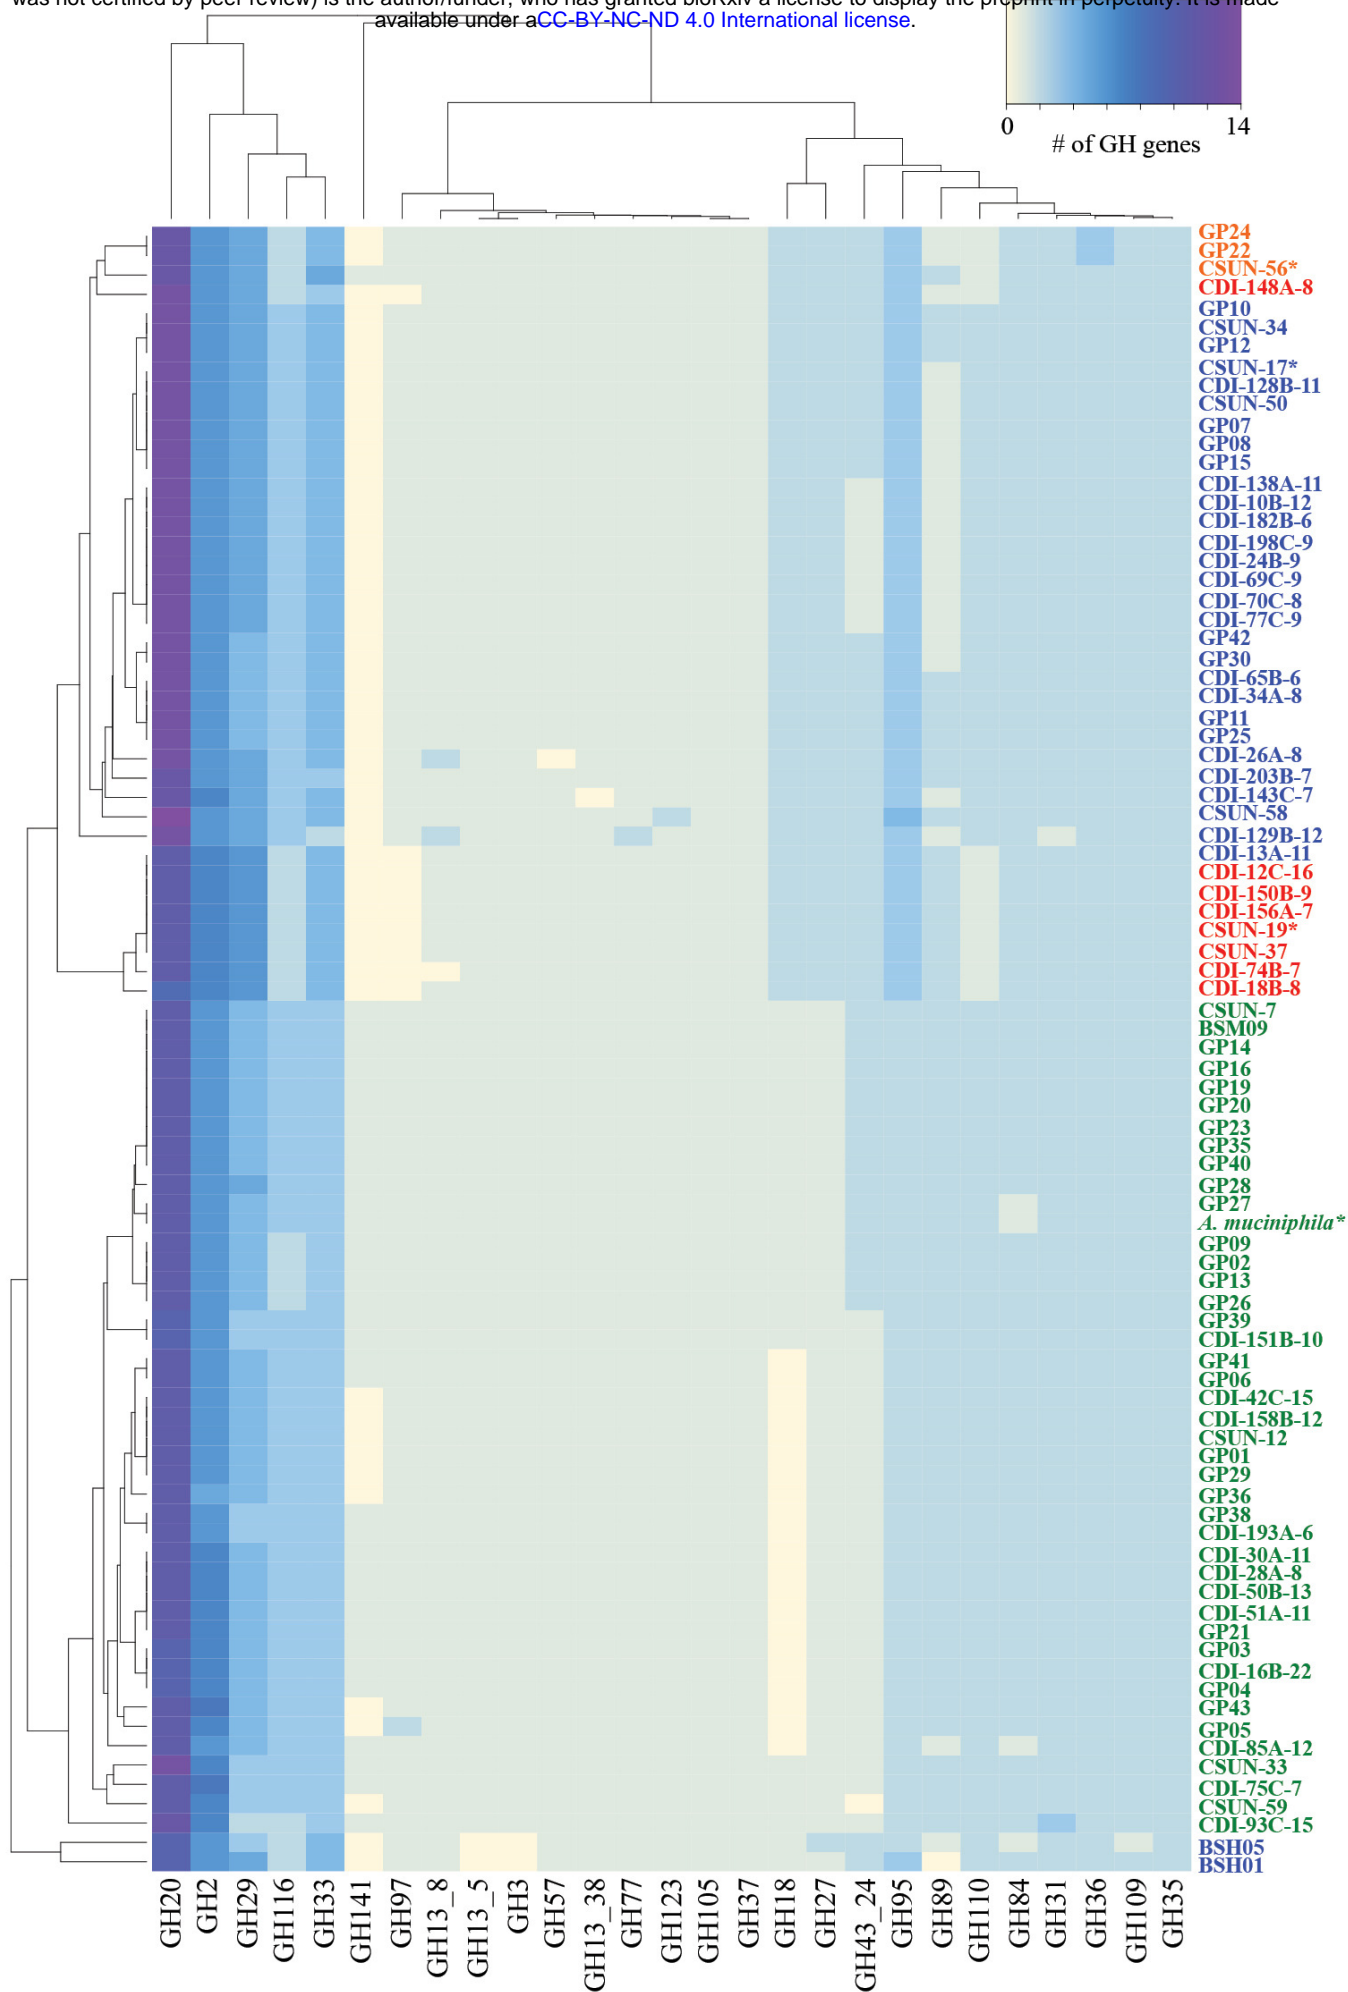

**2'-FL \*\***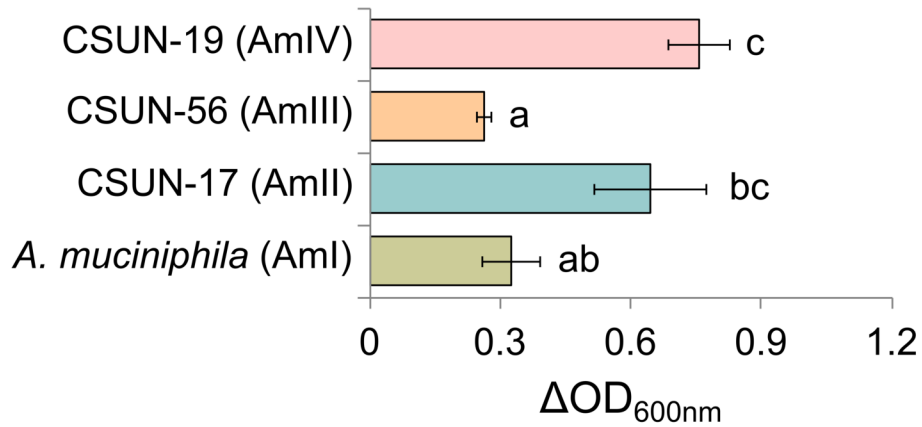**3-FL \*\***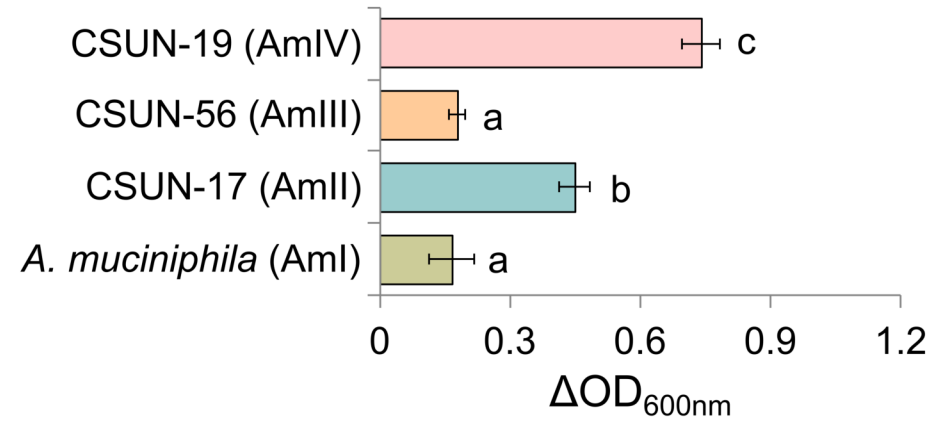**LNT**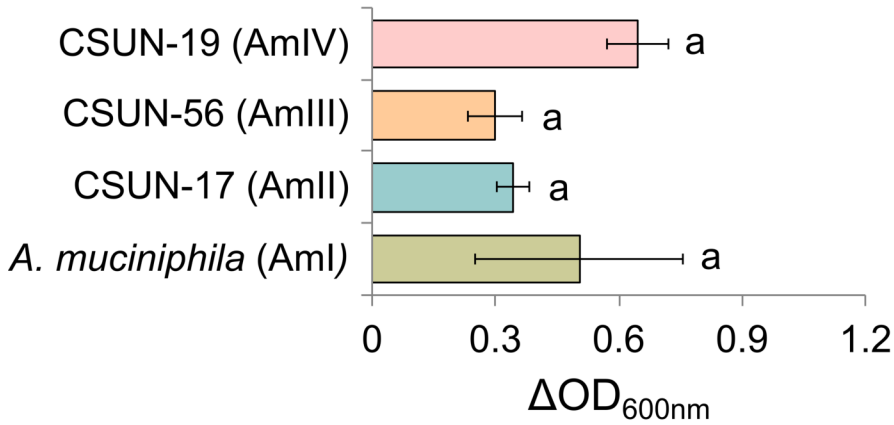**LNnT \*\*\***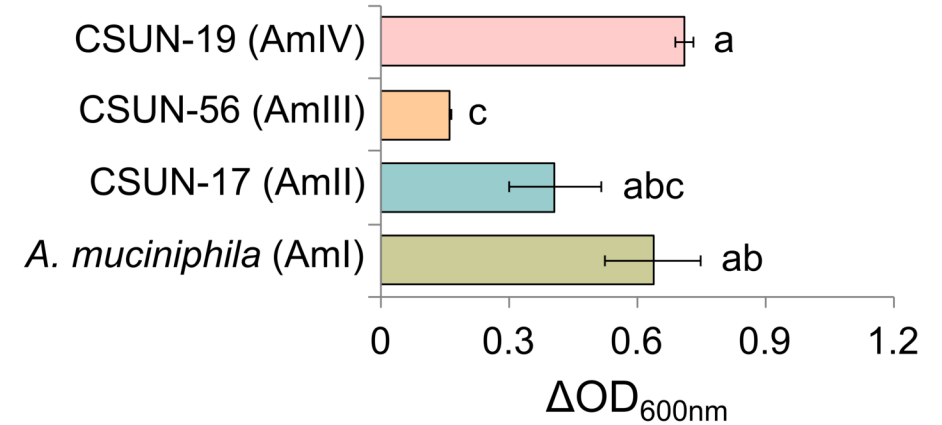**6'-SL \***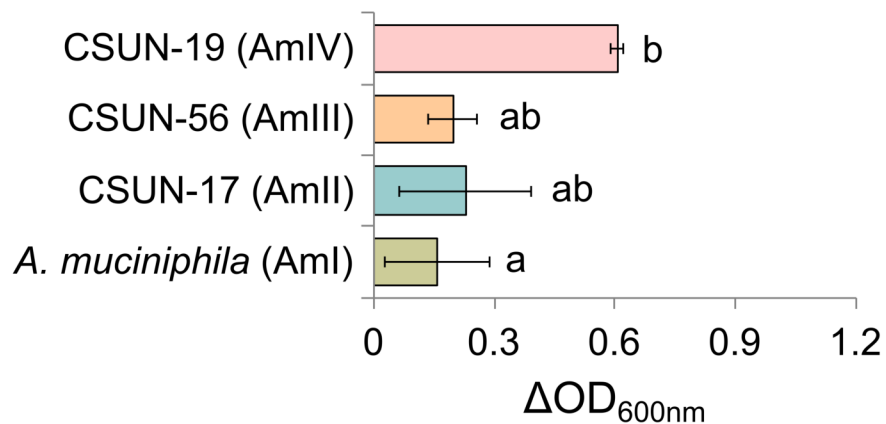**Lactose**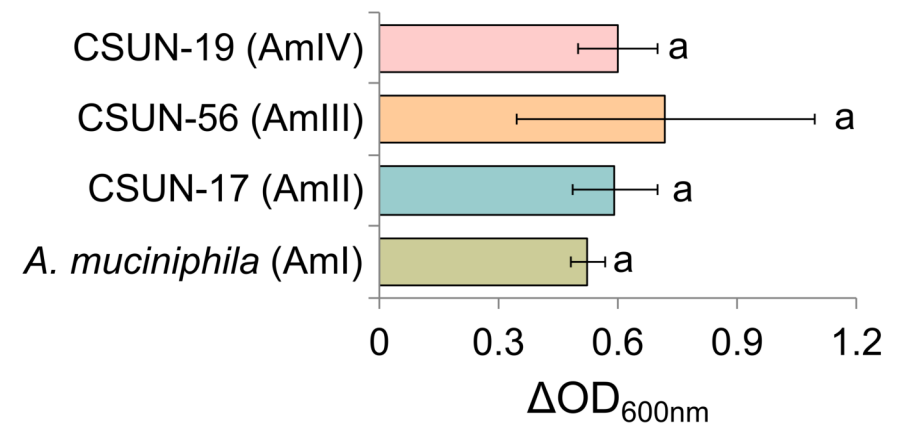

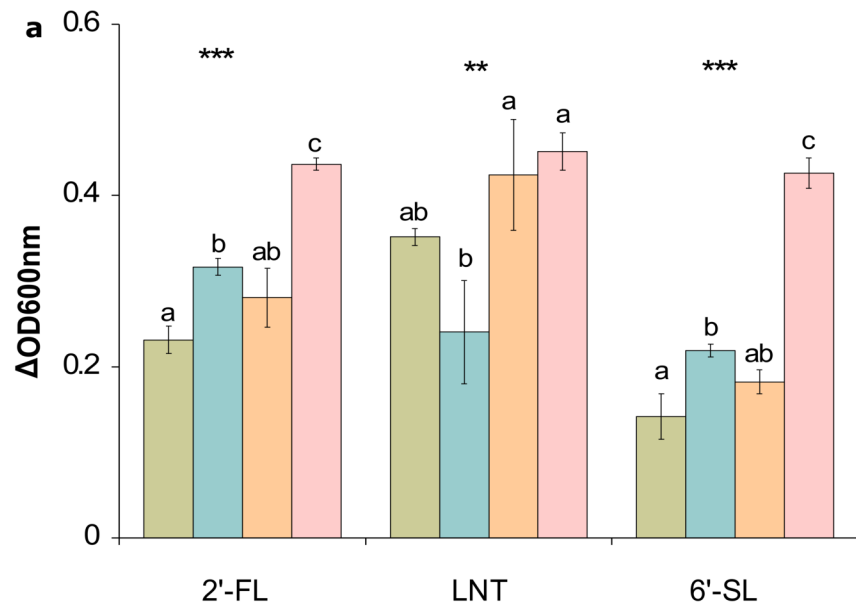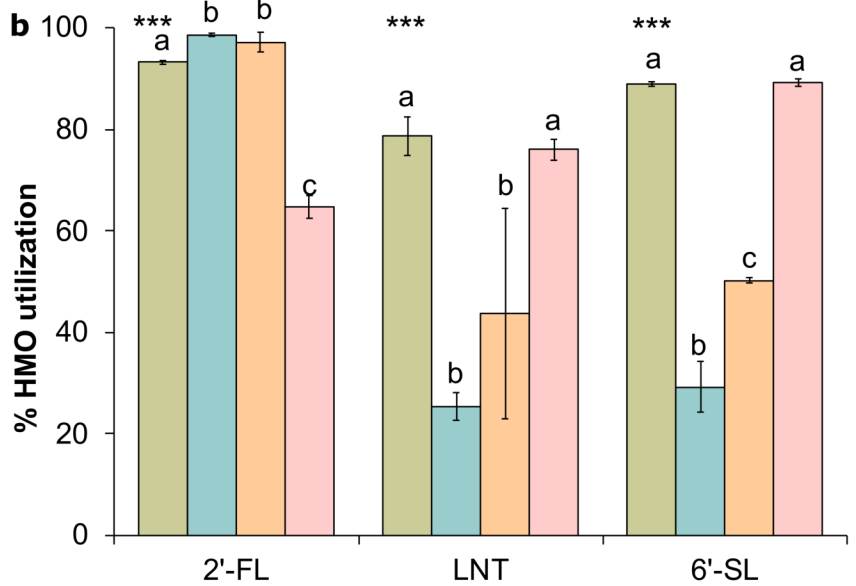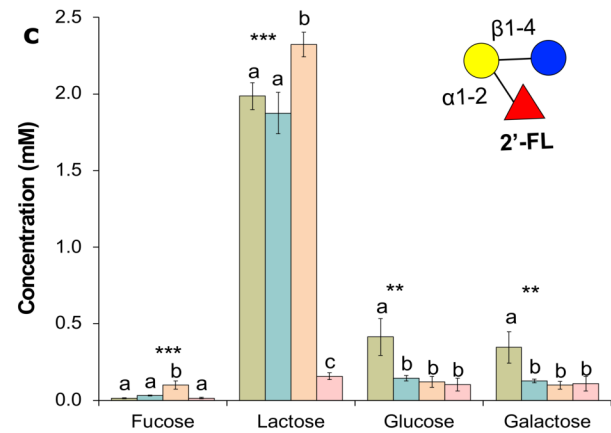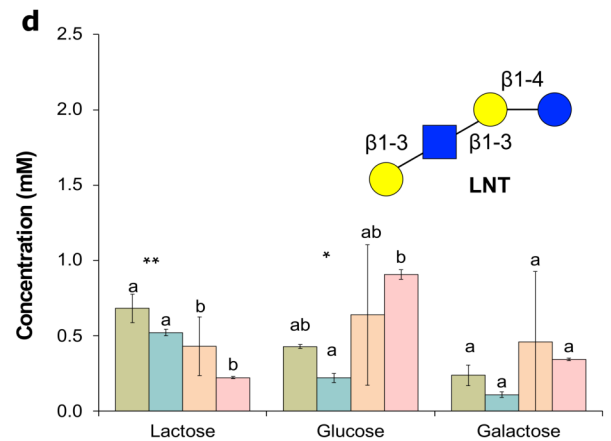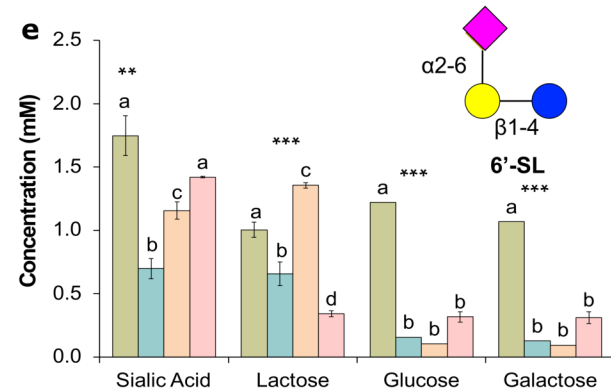

**Strain key:**

- *A. muciniphila* Muc<sup>T</sup> (AmI)
- CSUN-17 (AmII)
- CSUN-56 (AmIII)
- CSUN-19 (AmIV)

**Monosaccharide key:**

- Glucose
- Galactose
- N-acetylglucosamine
- ▲ Fucose
- ◆ Sialic Acid
